## **Emergent populations derived with unsupervised learning of human whole genomes**

eMalick G Njie

The author has withdrawn this manuscript in connection with the resolution of a dispute regarding the manuscript authorship and copyright ownership. The author does not wish this work to be cited as reference for the project.
